# Supplementary material
Source: ML conference proceedings conference paper supplement (https://openaccess.thecvf.com/content/CVPR2025/html/Chen_Florence-VL_Enhancing_Vision-Language_CVPR_2025_paper.html)
Supplement: Supplementary file 1 [file Chen_Florence-VL_Enhancing_Vision-Language_CVPR_2025_supplemental.pdf]

# Florence-VL: Enhancing Vision-Language Models with Generative Vision Encoder and Depth-Breadth Fusion

## Supplementary Material

### 9. Training Details

We selected two language backbones: Phi-3.5-mini-Instruct<sup>1</sup> and LLaMA-3.1-8B-Instruct<sup>2</sup>. For the main results, using the 16.9M image caption dataset and 10M instruction datasets, we trained all models on 8 nodes with 64 Nvidia H100 GPUs. The training process consists of two stages: pretraining and instruction tuning. During the pretraining stage, unlike LLaVA 1.5 which only tunes the projection layer, we fine-tune the entire model, including the vision backbone Florence-2, projection layer, and language model. We found that tuning the entire model yields better performance than freezing the vision and language models. In the fine-tuning stage, we tune only the projection layer and language models. For LLaMA-3.1-8B-Instruct, the global batch size for pretraining stage is 256, with a cosine decay learning rate with maximum value  $2e-5$ . In the fine-tuning stage, we maintain a global batch size of 256 and a learning rate of  $1e-5$ . For Phi-3.5-mini-Instruct, the global batch size for pretraining stage is 4096, with a cosine decay learning rate with maximum value  $1e-4$ . In the fine-tuning stage, the global batch size is 2048 and learning rate is  $9e-5$ .

### 10. Discussion

**OCR feature is essential for text based image understanding.** In Table 6a, we examine the role of OCR in understanding images containing text. To evaluate the effect of the OCR feature, we retain only the caption and grounding features. The results in Table 6a indicate that, apart from TextVQA benchmark, the OCR feature is beneficial for extracting textual information from images in the other benchmarks.

**Knowledge based benchmark rely more on the capability of language model.** In Table 6b we removing the caption and grounding features does not result in a significant difference, suggesting that the knowledge-based benchmark scarcely relies on various visual information. Additionally, Table 2 shows that the performance of the knowledge-based benchmark improves with the use of stronger language models.

### References

- [1] Marah Abdin, Jyoti Aneja, Hany Awadalla, Ahmed Awadallah, Ammar Ahmad Awan, Nguyen Bach, Amit Bahree,

<sup>1</sup><https://huggingface.co/microsoft/Phi-3.5-mini-instruct>

<sup>2</sup><https://huggingface.co/meta-llama/Meta-Llama-3.1-8B-Instruct>

- Arash Bakhtiari, Jianmin Bao, Harkirat Behl, et al. Phi-3 technical report: A highly capable language model locally on your phone. [arXiv preprint arXiv:2404.14219](https://arxiv.org/abs/2404.14219), 2024. 6
- [2] Jinze Bai, Shuai Bai, Shusheng Yang, Shijie Wang, Sinan Tan, Peng Wang, Junyang Lin, Chang Zhou, and Jingren Zhou. Qwen-vl: A frontier large vision-language model with versatile abilities. [arXiv preprint arXiv:2308.12966](https://arxiv.org/abs/2308.12966), 2023. 7
- [3] Jinze Bai, Shuai Bai, Shusheng Yang, Shijie Wang, Sinan Tan, Peng Wang, Junyang Lin, Chang Zhou, and Jingren Zhou. Qwen-vl: A versatile vision-language model for understanding, localization, text reading, and beyond, 2023. 5
- [4] Soravit Changpinyo, Piyush Sharma, Nan Ding, and Radu Soricut. Conceptual 12m: Pushing web-scale image-text pre-training to recognize long-tail visual concepts. In *Proceedings of the IEEE/CVF conference on computer vision and pattern recognition*, pages 3558–3568, 2021. 5
- [5] Lin Chen, Jinsong Li, Xiaoyi Dong, Pan Zhang, Conghui He, Jiaqi Wang, Feng Zhao, and Dahua Lin. Sharegpt4v: Improving large multi-modal models with better captions, 2023. 5
- [6] Lin Chen, Jinsong Li, Xiaoyi Dong, Pan Zhang, Yuhang Zang, Zehui Chen, Haodong Duan, Jiaqi Wang, Yu Qiao, Dahua Lin, et al. Are we on the right way for evaluating large vision-language models? [arXiv preprint arXiv:2403.20330](https://arxiv.org/abs/2403.20330), 2024. 5
- [7] Zhe Chen, Weiyun Wang, Hao Tian, Shenglong Ye, Zhangwei Gao, Erfei Cui, Wenwen Tong, Kongzhi Hu, Jiapeng Luo, Zheng Ma, et al. How far are we to gpt-4v? closing the gap to commercial multimodal models with open-source suites. [arXiv preprint arXiv:2404.16821](https://arxiv.org/abs/2404.16821), 2024. 8
- [8] Karan Desai, Gaurav Kaul, Zubin Aysola, and Justin Johnson. Redcaps: Web-curated image-text data created by the people, for the people. [arXiv preprint arXiv:2111.11431](https://arxiv.org/abs/2111.11431), 2021. 5
- [9] Mingyu Ding, Bin Xiao, Noel Codella, Ping Luo, Jingdong Wang, and Lu Yuan. Davit: Dual attention vision transformers. In *European conference on computer vision*, pages 74–92. Springer, 2022. 2
- [10] Xiaoran Fan, Tao Ji, Changhao Jiang, Shuo Li, Senjie Jin, Sirui Song, Junke Wang, Boyang Hong, Lu Chen, Guodong Zheng, et al. Mousi: Poly-visual-expert vision-language models. [arXiv preprint arXiv:2401.17221](https://arxiv.org/abs/2401.17221), 2024. 8
- [11] Chaoyou Fu, Peixian Chen, Yunhang Shen, Yulei Qin, Mengdan Zhang, Xu Lin, Jinrui Yang, Xiawu Zheng, Ke Li, Xing Sun, Yunsheng Wu, and Rongrong Ji. Mme: A comprehensive evaluation benchmark for multimodal large language models, 2024. 5
- [12] Samir Yitzhak Gadre, Gabriel Ilharco, Alex Fang, Jonathan Hayase, Georgios Smyrnis, Thao Nguyen, Ryan Marten, Mitchell Wortsman, Dhruva Ghosh, Jieyu Zhang, et al.

|                | OCRBench    | ChartQA     | DocVQA      | InfoVQA     | Average     |
|----------------|-------------|-------------|-------------|-------------|-------------|
| Florence-VL 7B | <b>41.4</b> | <b>24.3</b> | <b>44.5</b> | <b>29.4</b> | <b>34.9</b> |
| OCR            | 40.9        | 22.9        | 44.4        | 29.0        | 34.2        |

(a) Ablation study on OCR features on OCR & Chart benchmark.

|                | AI2D        | MathVista   | MMMU        | SciQA-IMG   | Average     |
|----------------|-------------|-------------|-------------|-------------|-------------|
| Florence-VL 7B | <b>57.2</b> | <b>28.0</b> | 35.6        | <b>66.5</b> | 46.8        |
| Caption        | 56.8        | 27.5        | <b>36.9</b> | 65.5        | 46.7        |
| OCR            | 55.7        | 27.0        | 35.8        | 65.6        | 46.0        |
| Grounding      | 56.7        | 27.9        | <b>36.9</b> | 66.4        | <b>47.0</b> |

(b) Ablation Studies on Knowledge based benchmarks.

Table 6. Ablation studies on different features for various benchmarks.

- Datacomp: In search of the next generation of multi-modal datasets. *Advances in Neural Information Processing Systems*, 36, 2024. [5](#)
- [13] Yash Goyal, Tejas Khot, Douglas Summers-Stay, Dhruv Batra, and Devi Parikh. Making the v in vqa matter: Elevating the role of image understanding in visual question answering. In *Proceedings of the IEEE conference on computer vision and pattern recognition*, pages 6904–6913, 2017. [5](#)
- [14] Danna Gurari, Qing Li, Abigale J Stangl, Anhong Guo, Chi Lin, Kristen Grauman, Jiebo Luo, and Jeffrey P Bigham. Vizwiz grand challenge: Answering visual questions from blind people. In *Proceedings of the IEEE conference on computer vision and pattern recognition*, pages 3608–3617, 2018. [5](#)
- [15] Qidong Huang, Xiaoyi Dong, Pan Zhang, Yuhang Zang, Yuhang Cao, Jiaqi Wang, Dahua Lin, Weiming Zhang, and Nenghai Yu. Deciphering cross-modal alignment in large vision-language models with modality integration rate. *arXiv preprint arXiv:2410.07167*, 2024. [4](#)
- [16] Drew A Hudson and Christopher D Manning. Gqa: A new dataset for real-world visual reasoning and compositional question answering. In *Proceedings of the IEEE/CVF conference on computer vision and pattern recognition*, pages 6700–6709, 2019. [5](#)
- [17] HuggingFaceM4/Docmatix.  
<https://huggingface.co/datasets/huggingfacem4/docmatix>.  
<https://huggingface.co/datasets/HuggingFaceM4/Docmatix>, 2024. [5](#)
- [18] Oğuzhan Fatih Kar, Alessio Tonioni, Petra Pöklükar, Achin Kulshrestha, Amir Zamir, and Federico Tombari. Brave: Broadening the visual encoding of vision-language models. *arXiv preprint arXiv:2404.07204*, 2024. [8](#)
- [19] Aniruddha Kembhavi, Mike Salvato, Eric Kolve, Minjoon Seo, Hannaneh Hajishirzi, and Ali Farhadi. A diagram is worth a dozen images. In *Computer Vision–ECCV 2016: 14th European Conference, Amsterdam, The Netherlands, October 11–14, 2016, Proceedings, Part IV 14*, pages 235–251. Springer, 2016. [5](#)
- [20] Alexander Kirillov, Eric Mintun, Nikhila Ravi, Hanzi Mao, Chloe Rolland, Laura Gustafson, Tete Xiao, Spencer Whitehead, Alexander C Berg, Wan-Yen Lo, et al. Segment anything. In *Proceedings of the IEEE/CVF International Conference on Computer Vision*, pages 4015–4026, 2023. [1, 7](#)
- [21] Bohao Li, Rui Wang, Guangzhi Wang, Yuying Ge, Yixiao Ge, and Ying Shan. Seed-bench: Benchmarking multimodal llms with generative comprehension. *arXiv preprint arXiv:2307.16125*, 2023. [5](#)
- [22] Yifan Li, Yifan Du, Kun Zhou, Jinpeng Wang, Wayne Xin Zhao, and Ji-Rong Wen. Evaluating object hallucination in large vision-language models. *arXiv preprint arXiv:2305.10355*, 2023. [5](#)
- [23] Yanwei Li, Yuechen Zhang, Chengyao Wang, Zhisheng Zhong, Yixin Chen, Ruihang Chu, Shaoteng Liu, and Jiaya Jia. Mini-gemini: Mining the potential of multi-modality vision language models. *arXiv preprint arXiv:2403.18814*, 2024. [6](#)
- [24] Ji Lin, Hongxu Yin, Wei Ping, Pavlo Molchanov, Mohammad Shoeybi, and Song Han. Vila: On pre-training for visual language models. In *Proceedings of the IEEE/CVF Conference on Computer Vision and Pattern Recognition*, pages 26689–26699, 2024. [6, 7](#)
- [25] Haotian Liu, Chunyuan Li, Yuheng Li, Bo Li, Yuanhan Zhang, Sheng Shen, and Yong Jae Lee. Llava-next: Improved reasoning, ocr, and world knowledge, 2024. [6, 8](#)
- [26] Haotian Liu, Chunyuan Li, Qingyang Wu, and Yong Jae Lee. Visual instruction tuning. *Advances in neural information processing systems*, 36, 2024. [1, 2, 4, 5, 6, 7](#)
- [27] Yuan Liu, Haodong Duan, Yuanhan Zhang, Bo Li, Songyang Zhang, Wangbo Zhao, Yike Yuan, Jiaqi Wang, Conghui He, Ziwei Liu, et al. Mmbench: Is your multi-modal model an all-around player? *arXiv preprint arXiv:2307.06281*, 2023. [5](#)
- [28] Yuliang Liu, Zhang Li, Biao Yang, Chunyuan Li, Xucheng Yin, Chenglin Liu, Lianwen Jin, and Xiang Bai. On the hidden mystery of ocr in large multimodal models, 2024. [5](#)
- [29] Pan Lu, Swaroop Mishra, Tanglin Xia, Liang Qiu, Kai-Wei Chang, Song-Chun Zhu, Oyvind Tafjord, Peter Clark, and Ashwin Kalyan. Learn to explain: Multimodal reasoning via thought chains for science question answering. *Advances in Neural Information Processing Systems*, 35:2507–2521, 2022. [5](#)
- [30] Pan Lu, Hritik Bansal, Tony Xia, Jiacheng Liu, Chunyuan Li, Hannaneh Hajishirzi, Hao Cheng, Kai-Wei Chang, Michel Galley, and Jianfeng Gao. Mathvista: Evaluating mathematical reasoning of foundation models in visual contexts. *arXiv preprint arXiv:2310.02255*, 2023. [5](#)

- [31] Ahmed Masry, Do Xuan Long, Jia Qing Tan, Shafiq Joty, and Enamul Hoque. Chartqa: A benchmark for question answering about charts with visual and logical reasoning. arXiv preprint arXiv:2203.10244, 2022. 5
- [32] Minesh Mathew, Dimosthenis Karatzas, and CV Jawahar. Docvqa: A dataset for vqa on document images. In Proceedings of the IEEE/CVF winter conference on applications of computer vision, pages 2200–2209, 2021. 5
- [33] Minesh Mathew, Viraj Bagal, Rubèn Tito, Dimosthenis Karatzas, Ernest Valveny, and CV Jawahar. Infographicvqa. In Proceedings of the IEEE/CVF Winter Conference on Applications of Computer Vision, pages 1697–1706, 2022. 5
- [34] Maxime Oquab, Timothée Darcet, Théo Moutakanni, Huy Vo, Marc Szafraniec, Vasil Khalidov, Pierre Fernandez, Daniel Haziza, Francisco Massa, Alaaeldin El-Nouby, et al. Dinov2: Learning robust visual features without supervision. arXiv preprint arXiv:2304.07193, 2023. 1, 5, 7
- [35] Alec Radford, Jong Wook Kim, Chris Hallacy, Aditya Ramesh, Gabriel Goh, Sandhini Agarwal, Girish Sastry, Amanda Askell, Pamela Mishkin, Jack Clark, et al. Learning transferable visual models from natural language supervision. In International conference on machine learning, pages 8748–8763. PMLR, 2021. 1
- [36] Robin Rombach, Andreas Blattmann, Dominik Lorenz, Patrick Esser, and Björn Ommer. High-resolution image synthesis with latent diffusion models. In Proceedings of the IEEE/CVF Conference on Computer Vision and Pattern Recognition (CVPR), pages 10684–10695, 2022. 5
- [37] Robin Rombach, Andreas Blattmann, Dominik Lorenz, Patrick Esser, and Björn Ommer. High-resolution image synthesis with latent diffusion models. In Proceedings of the IEEE/CVF conference on computer vision and pattern recognition, pages 10684–10695, 2022. 1, 7
- [38] Min Shi, Fuxiao Liu, Shihao Wang, Shijia Liao, Subhashree Radhakrishnan, De-An Huang, Hongxu Yin, Karan Sapra, Yaser Yacoob, Humphrey Shi, et al. Eagle: Exploring the design space for multimodal llms with mixture of encoders. arXiv preprint arXiv:2408.15998, 2024. 1
- [39] Amanpreet Singh, Vivek Natarajan, Meet Shah, Yu Jiang, Xinlei Chen, Dhruv Batra, Devi Parikh, and Marcus Rohrbach. Towards vqa models that can read. In Proceedings of the IEEE/CVF conference on computer vision and pattern recognition, pages 8317–8326, 2019. 5
- [40] Vasu Singla, Kaiyu Yue, Sukriti Paul, Reza Shirkavand, Mayuka Jayawardhana, Alireza Ganjdanesh, Heng Huang, Abhinav Bhatele, Gowthami Somepalli, and Tom Goldstein. From pixels to prose: A large dataset of dense image captions, 2024. 5
- [41] Shengbang Tong, Ellis Brown, Penghao Wu, Sanghyun Woo, Manoj Middepogu, Sai Charitha Akula, Jihan Yang, Shusheng Yang, Adithya Iyer, Xichen Pan, et al. Cambrian-1: A fully open, vision-centric exploration of multimodal llms. arXiv preprint arXiv:2406.16860, 2024. 1, 2, 5, 6, 8
- [42] Shengbang Tong, Zhuang Liu, Yuexiang Zhai, Yi Ma, Yann LeCun, and Saining Xie. Eyes wide shut? exploring the visual shortcomings of multimodal llms. In Proceedings of the IEEE/CVF Conference on Computer Vision and Pattern Recognition, pages 9568–9578, 2024. 6
- [43] Lai Wei, Zhiqian Tan, Chenghai Li, Jindong Wang, and Weiran Huang. Large language model evaluation via matrix entropy. arXiv preprint arXiv:2401.17139, 2024. 4
- [44] x.ai. Grok 1.5v: The next generation of ai. <https://x.ai/blog/grok-1.5v>, 2023. Accessed: 2024-07-26. 6
- [45] Bin Xiao, Haiping Wu, Weijian Xu, Xiyang Dai, Houdong Hu, Yumao Lu, Michael Zeng, Ce Liu, and Lu Yuan. Florence-2: Advancing a unified representation for a variety of vision tasks. In Proceedings of the IEEE/CVF Conference on Computer Vision and Pattern Recognition, pages 4818–4829, 2024. 1, 2
- [46] Zhiyang Xu, Chao Feng, Rulin Shao, Trevor Ashby, Ying Shen, Di Jin, Yu Cheng, Qifan Wang, and Lifu Huang. Vision-flan: Scaling human-labeled tasks in visual instruction tuning, 2024. 5
- [47] Weihao Yu, Zhengyuan Yang, Linjie Li, Jianfeng Wang, Kevin Lin, Zicheng Liu, Xinchao Wang, and Lijuan Wang. Mm-vet: Evaluating large multimodal models for integrated capabilities. arXiv preprint arXiv:2308.02490, 2023. 5
- [48] Xiang Yue, Yuansheng Ni, Kai Zhang, Tianyu Zheng, Ruqi Liu, Ge Zhang, Samuel Stevens, Dongfu Jiang, Weiming Ren, Yuxuan Sun, et al. Mmmu: A massive multi-discipline multimodal understanding and reasoning benchmark for expert agi. In Proceedings of the IEEE/CVF Conference on Computer Vision and Pattern Recognition, pages 9556–9567, 2024. 5
- [49] Deyao Zhu, Jun Chen, Xiaoqian Shen, Xiang Li, and Mohamed Elhoseiny. Minigpt-4: Enhancing vision-language understanding with advanced large language models. arXiv preprint arXiv:2304.10592, 2023. 1, 7
